# Supplementary material for: Two New Mitogenomes of Bibionidae and Their Comparison within the Infraorder Bibionomorpha (Diptera)
Source: MDPI journal article supplement (doi:10.3390/genes14071485), 2023-07-21
Supplement: s1 [file s1]

**Table S2 Composition and skewness of 20 species of mtgenomes in the Bibionomorpha.**

| Superfamily   | Species                       | A%    | T%    | G%    | C%    | A+T%  | AT-Skew | GC-Skew |
|---------------|-------------------------------|-------|-------|-------|-------|-------|---------|---------|
| Bibionoidea   | <i>Penthetria simplioipes</i> | 40.20 | 39.40 | 8.00  | 12.30 | 79.60 | 0.0101  | -0.2118 |
|               | <i>Piecia hardyi</i>          | 40.00 | 39.90 | 8.20  | 11.80 | 79.90 | 0.0013  | -0.1800 |
|               | <i>Cramptonomyia spenceri</i> | 38.90 | 37.20 | 9.10  | 14.80 | 76.10 | 0.0223  | -0.2385 |
| Anisopodoidea | <i>Sylvicola fenestralis</i>  | 37.90 | 38.40 | 10.10 | 13.50 | 76.30 | -0.0066 | -0.1441 |
| Scatopsoidea  | <i>Coboldia fuscipes</i>      | 39.50 | 36.70 | 9.50  | 14.30 | 76.20 | 0.0380  | -0.1990 |
| Sciaroidea    | <i>Mayetiola destructor</i>   | 44.60 | 39.50 | 7.10  | 8.80  | 84.10 | 0.0606  | -0.1069 |
|               | <i>Orseolia oryzae</i>        | 47.40 | 38.30 | 6.20  | 8.10  | 85.70 | 0.1062  | -0.1329 |
|               | <i>Rhopalomyia pomum</i>      | 44.60 | 40.60 | 6.50  | 8.30  | 85.20 | 0.0469  | -0.1216 |
|               | <i>Sciara ruficauda</i>       | 40.10 | 38.80 | 8.70  | 12.40 | 78.90 | 0.0165  | -0.1754 |
|               | <i>Pseudolycoriella</i> sp.   | 39.10 | 39.90 | 9.30  | 11.60 | 79.00 | -0.0101 | -0.1100 |
|               | <i>Pnyxia scabiei</i>         | 41.40 | 35.80 | 7.70  | 15.10 | 77.20 | 0.0725  | -0.3246 |
|               | <i>Trichosia lengersdorfi</i> | 40.90 | 38.50 | 8.00  | 12.60 | 79.40 | 0.0302  | -0.2233 |
|               | <i>Neoempheria proxima</i>    | 39.90 | 38.80 | 8.80  | 12.40 | 78.70 | 0.0140  | -0.1698 |
|               | <i>Epicypta</i> sp.           | 38.60 | 40.80 | 9.10  | 11.10 | 79.40 | -0.0280 | -0.1020 |
|               | <i>Epicypta xiphothorna</i>   | 38.70 | 39.90 | 8.90  | 12.40 | 78.70 | -0.0152 | -0.1643 |
|               | <i>Azana</i> sp.              | 42.50 | 37.70 | 7.10  | 12.70 | 80.20 | 0.0501  | -0.2828 |
|               | <i>Acnemia nitidicollis</i>   | 42.20 | 38.30 | 7.80  | 11.80 | 80.50 | 0.0484  | -0.2041 |
|               | <i>Allodia</i> sp.            | 38.00 | 37.80 | 10.30 | 13.90 | 75.90 | 0.0026  | -0.1488 |
|               | <i>Allodia anglofennica</i>   | 38.30 | 37.80 | 10.10 | 13.90 | 76.00 | 0.0066  | -0.1583 |
|               | <i>Arachnocampa flava</i>     | 39.60 | 42.40 | 7.30  | 10.60 | 82.00 | -0.0341 | -0.1843 |
