# Supplementary material for: Two New Mitogenomes of Bibionidae and Their Comparison within the Infraorder Bibionomorpha (Diptera)
Source: MDPI journal article supplement (doi:10.3390/genes14071485), 2023-07-21

**Figure S1. Predicted secondary structures for 22 tRNAs in *Penthetria simplicioides***

**(A), and *Plecia hardyi* (B) mtgenomes. Nucleotides highlighted in red indicate mismatch.**

**A**

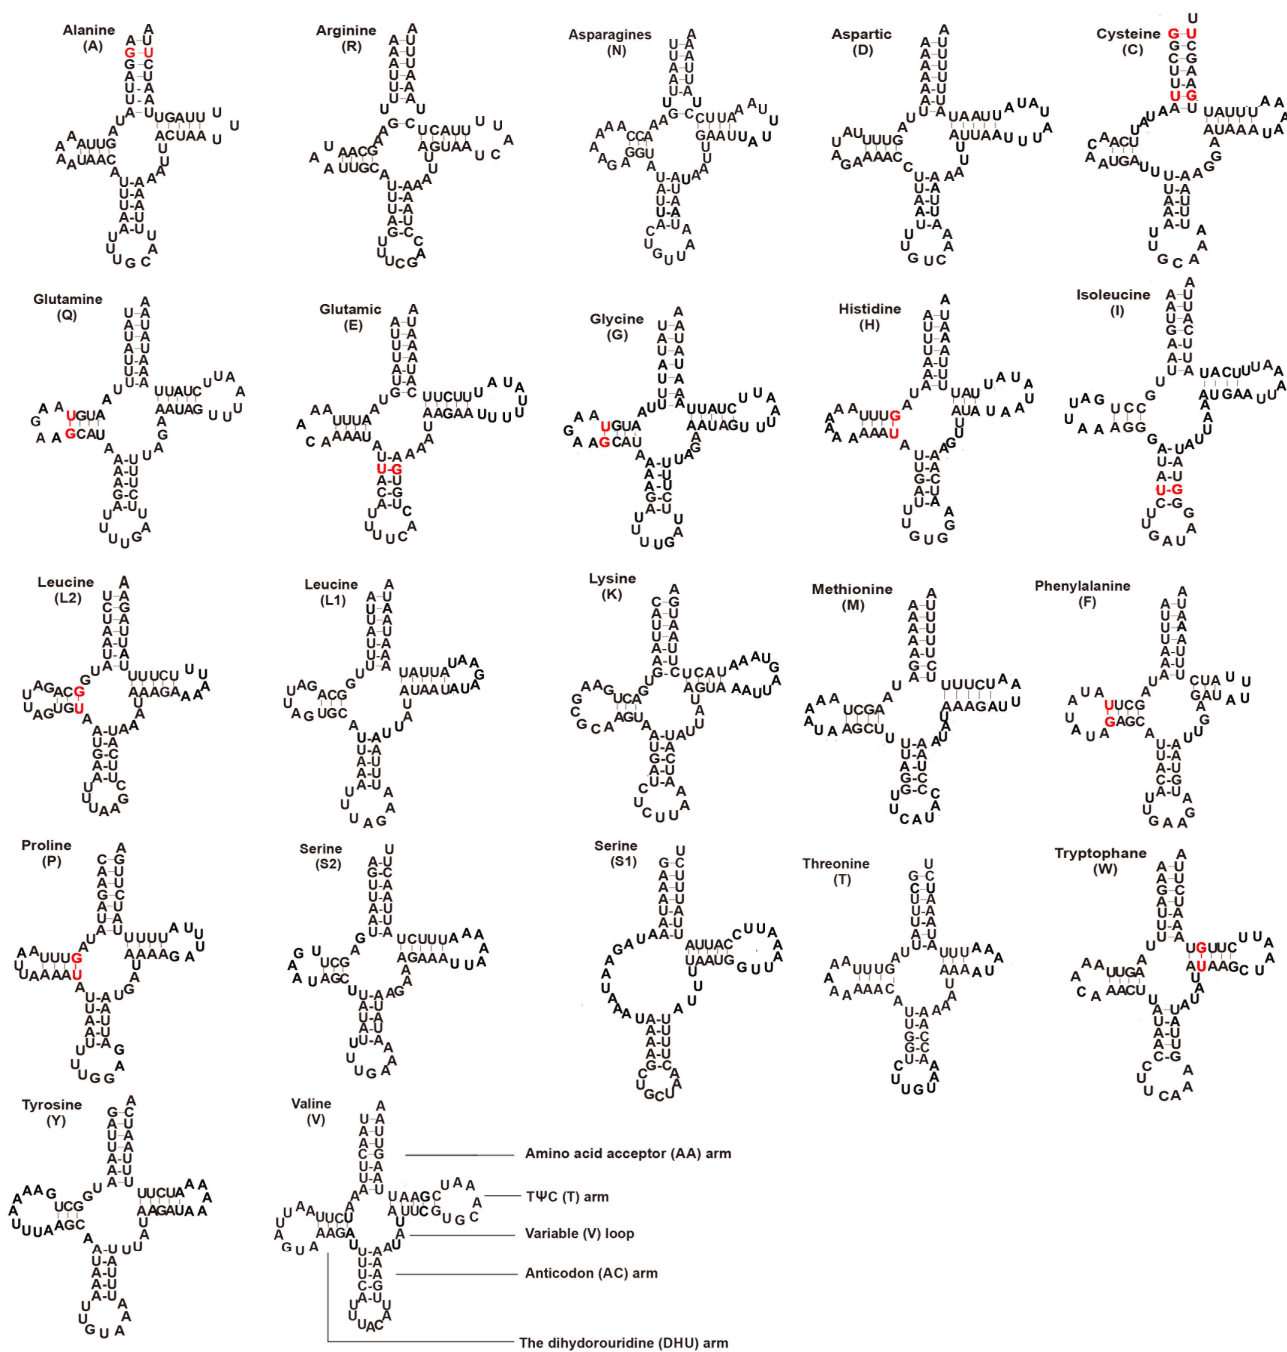

**B**

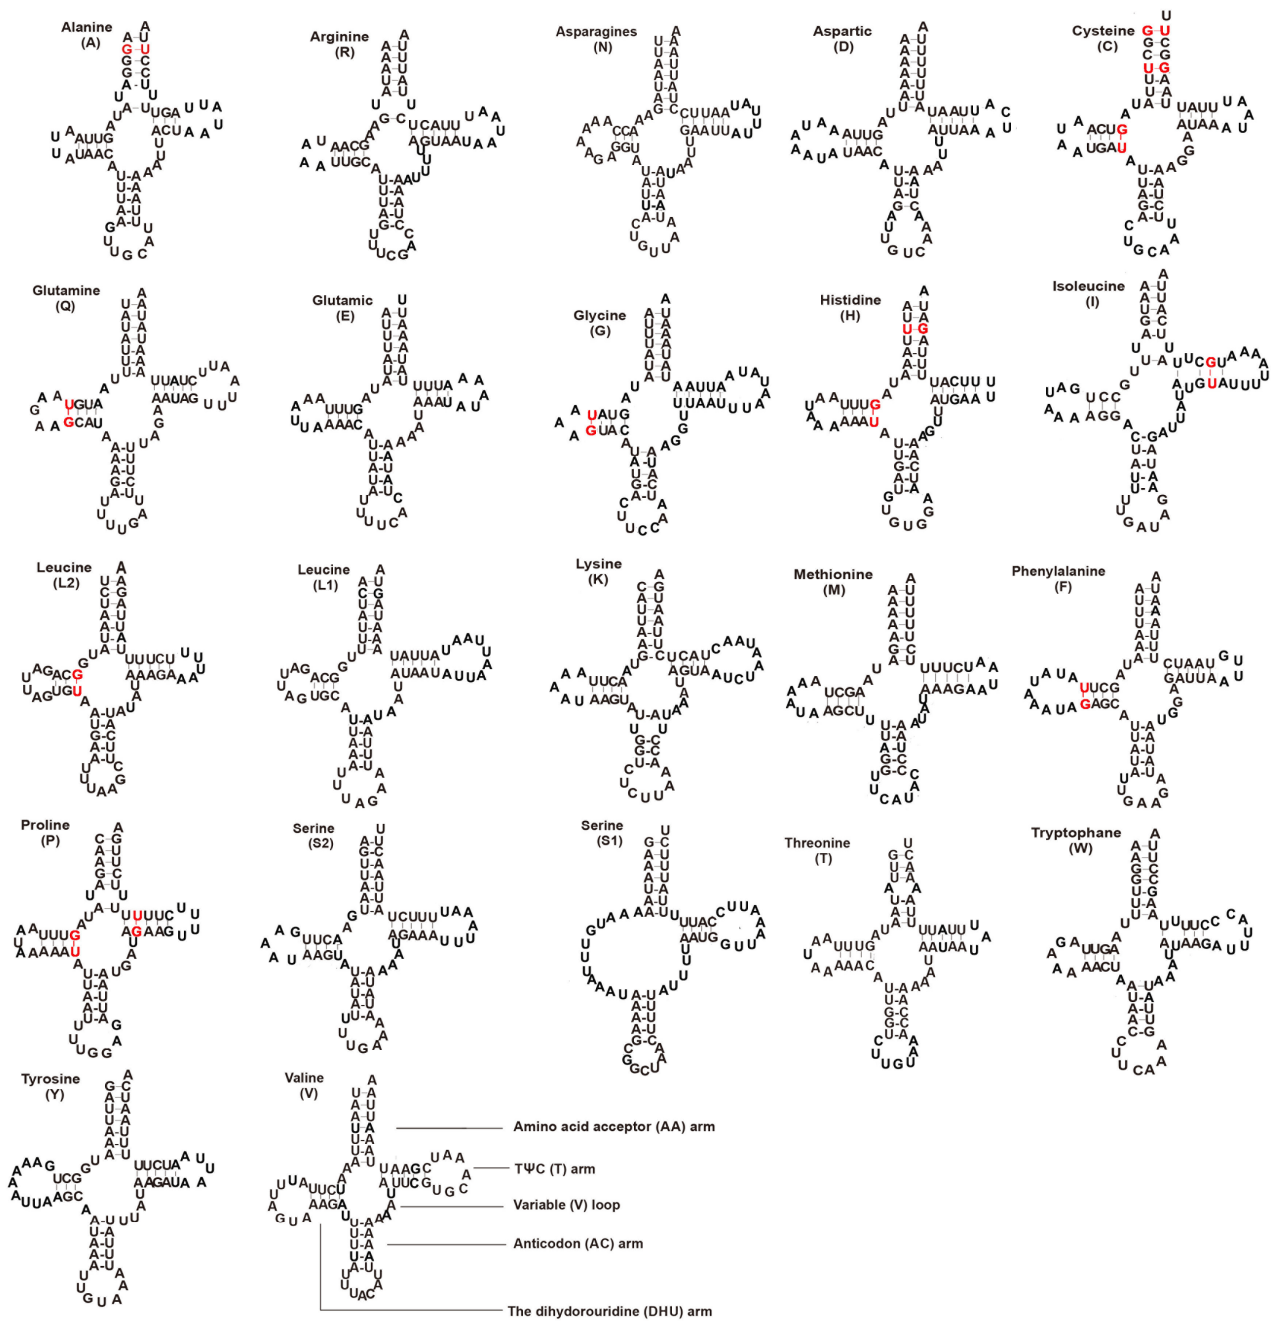

Supplement: s1 [file s1]
